# Supplementary material
Source: PubMed Central journal article supplement (PMC6483004)
Supplement: jciinsight-4-123879-s166.pdf [file jciinsight-4-123879-s166.pdf]

**SUPPLEMENTAL MATERIAL**

**Figure S1**

CONSORT 2010 Flow Diagram – START trial, Treg signature analysis

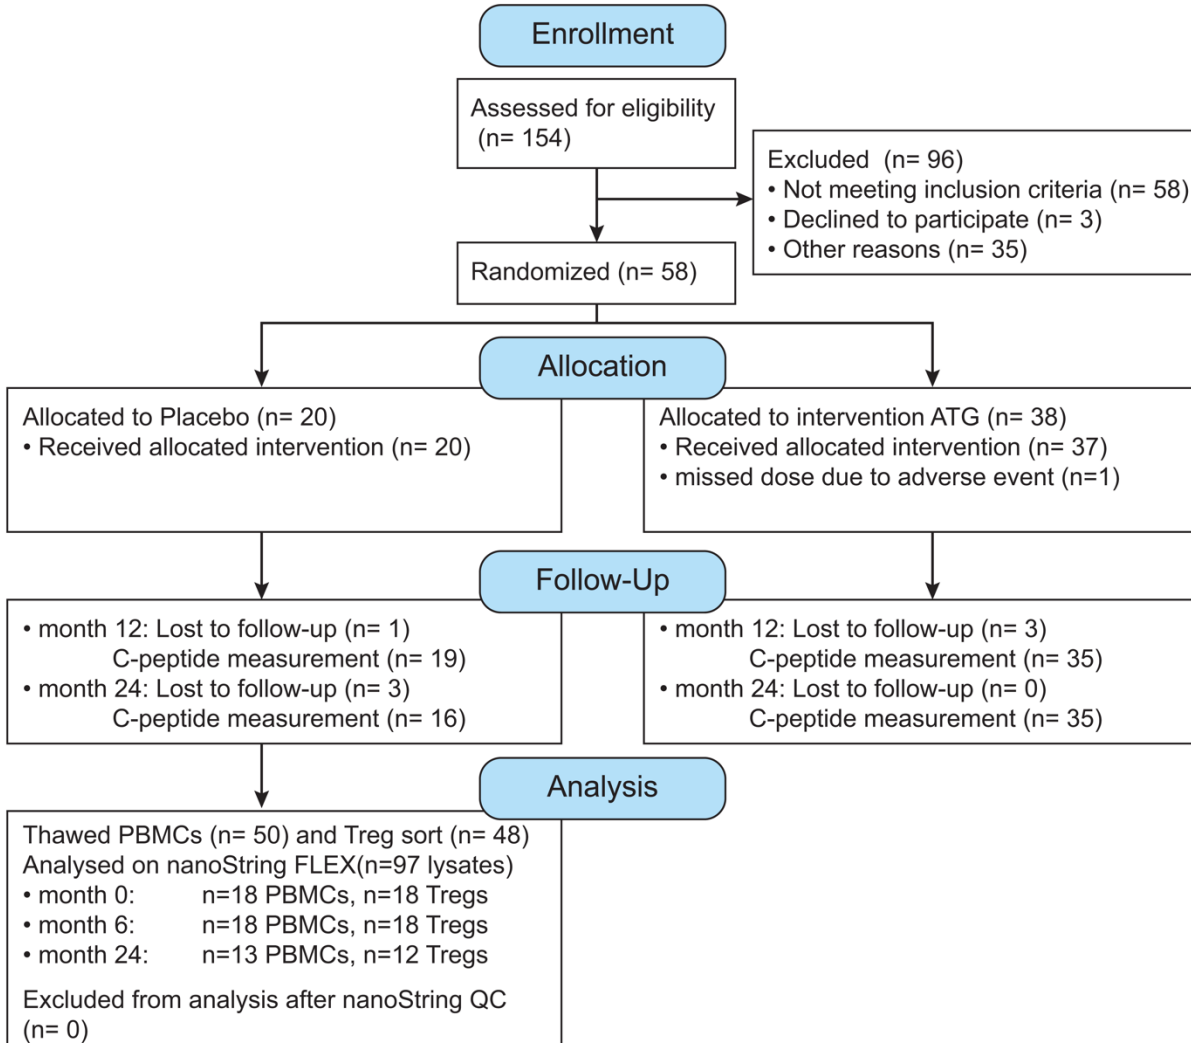

Enrollment to follow-up details adopted from: Gitelman, S. E., et al. (2016). "Antithymocyte globulin therapy for patients with recent-onset type 1 diabetes: 2 year results of a randomised trial." *Diabetologia* 59(6): 1153-1161.

**Supplemental Figure S1:** CONSORT diagram showing allocation and disposition of study subjects in the START trial and origin of samples for Treg gene signature analysis.

## Figure S2

CONSORT 2010 Flow Diagram – T1DAL trial, Treg signature analysis

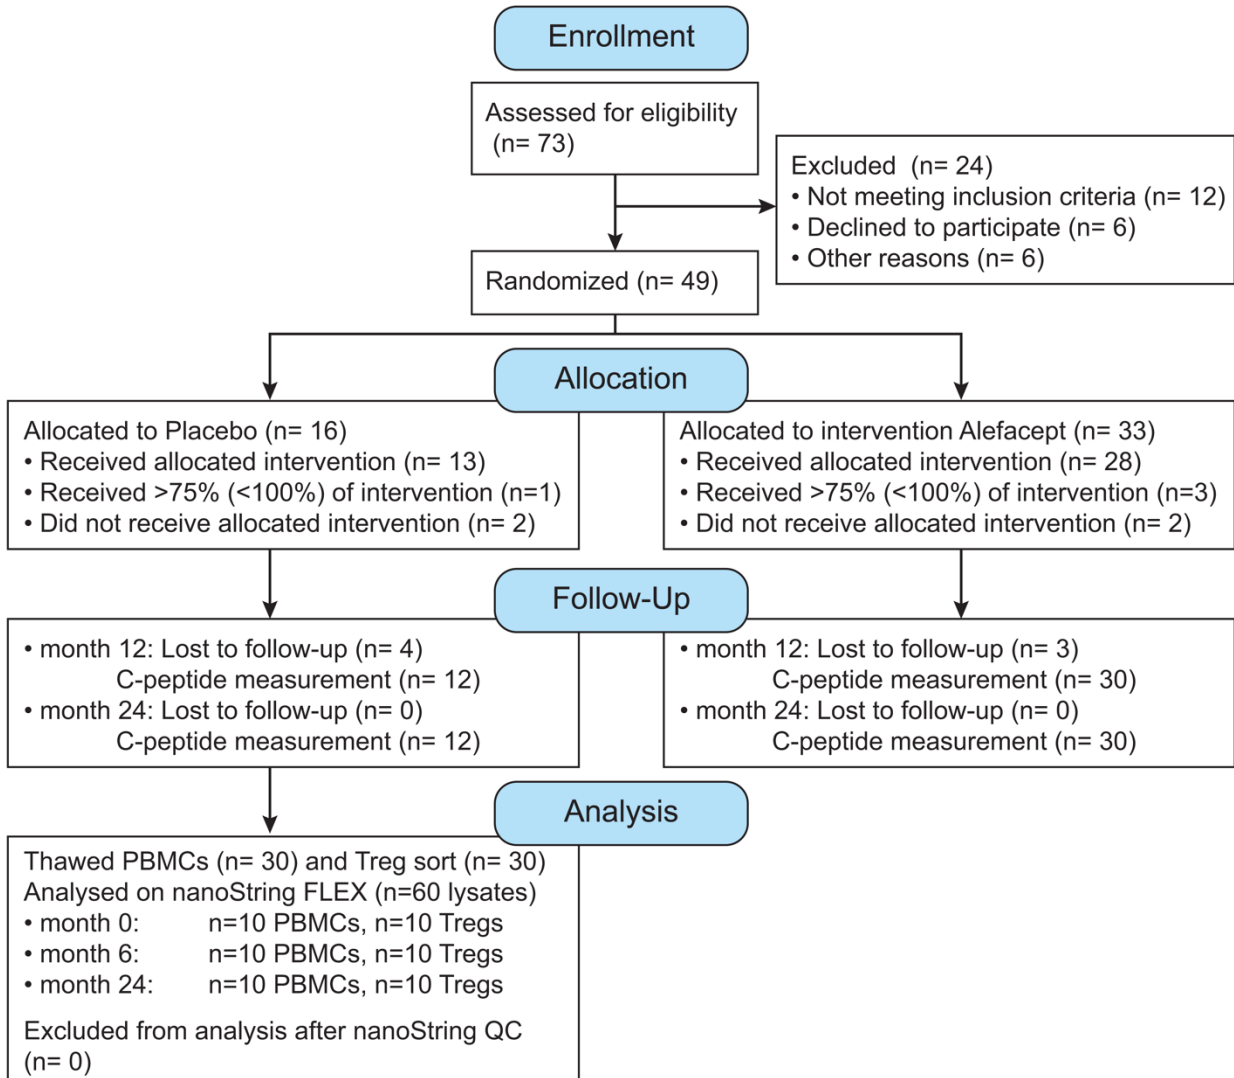

Enrollment to follow-up details adopted from: Rigby, M. R., et al. (2015). "Alefacept provides sustained clinical and immunological effects in new-onset type 1 diabetes patients." *J Clin Invest* 125(8): 3285-3296

**Supplemental Figure S2:** CONSORT diagram showing allocation and disposition of study subjects in the T1DAL trial and origin of samples for Treg gene signature analysis.

Figure S3

CONSORT 2010 Flow Diagram – UST1D trial, Treg signature analysis

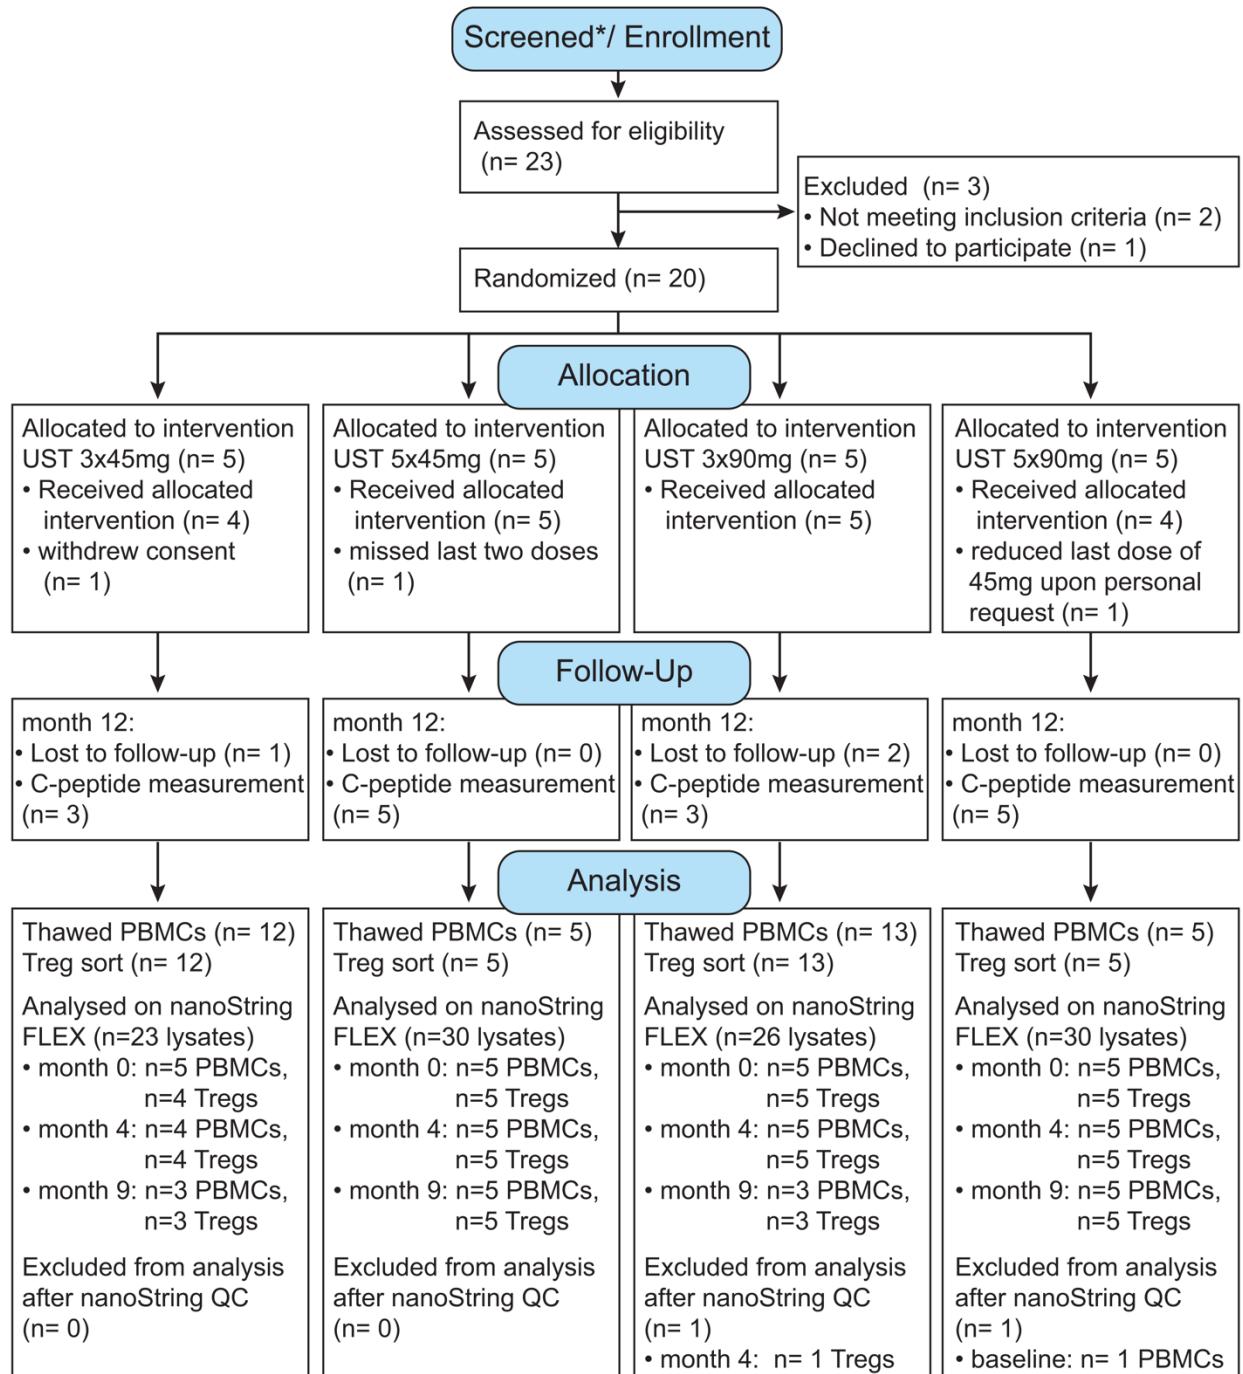

\* "Only Subjects that met inclusion criteria were approached and screened"

**Supplemental Figure S3:** CONSORT diagram showing allocation and disposition of study subjects in the UST1D trial and usage in Treg gene signature analysis. \* only subjects that met inclusion criteria were approached and screened.

**Supplemental Table T1:** Subject characteristics for samples run on the nCounter FLEX and reported in Figures 1-5.

|                                                    | new onset T1D vs healthy controls |              | cross sectional T1D vs healthy controls |               |
|----------------------------------------------------|-----------------------------------|--------------|-----------------------------------------|---------------|
|                                                    | new T1D                           | HC           | T1D                                     | HC            |
| number                                             | 20                                | 10           | 43                                      | 38            |
| Sex: % male (number males)                         | 40 (8)                            | 40 (4)       | 44.2 (19)                               | 42.1 (16)     |
| average age at sample collection [years] (min-max) | 24.3 (18-35)                      | 26.3 (20-36) | 28.5 (5-59)                             | 30.9 (6.1-59) |
| average age at diagnosis [years] (min-max)         | 24.1 (17.7-34.9)                  | n/a          | 17.7 (3-35)                             | n/a           |
| average time since diagnosis [months] (min-max)    | 2.1 (0.4-3.2)                     | n/a          | 129.1 (6-354)                           | n/a           |
| average random c-peptide [ng/mL] (min-max)         | n/a                               | n/a          | 0.34 (<0.05-3.75)                       | n/a           |
| average HbA1c [%] (min-max)                        | 8.6 (5.8-12.2)                    | n/a          | 7.5 ** (5.2-13.4)                       | n/a           |
| average IFCC HbA1c [mmol/mol] (min-max)            | 70 (40-110)                       | n/a          | 58 ** (33-123)                          | n/a           |

\*\* n=33 data points available

**Supplemental Table T2:** genotype for subjects' samples used in Figures 2 and 4

| SNP (disease associated allele) | genotype               | cross sectional T1D vs healthy controls |    |
|---------------------------------|------------------------|-----------------------------------------|----|
|                                 |                        | T1D                                     | HC |
| Ptpn2 rs478582 (T)              | (n genotype available) | 47                                      | 30 |
|                                 | T/T                    | 26                                      | 19 |
|                                 | T/C                    | 18                                      | 10 |
| Ptpn2 rs1893217 (C)             | (n genotype available) | 34                                      | 24 |
|                                 | C/C                    | 7                                       | 1  |
|                                 | T/C                    | 11                                      | 7  |
| Ptpn22 rs2476601(T)             | (n genotype available) | 47                                      | 30 |
|                                 | T/T                    | 6                                       | 1  |
|                                 | T/C                    | 6                                       | 4  |
| Cd25 rs2104286 (A)              | (n genotype available) | 47                                      | 29 |
|                                 | A/A                    | 31                                      | 16 |
|                                 | G/A                    | 12                                      | 10 |
| Cd25 rs11594656 (T)             | (n genotype available) | 47                                      | 29 |
|                                 | T/T                    | 29                                      | 17 |
|                                 | A/T                    | 18                                      | 10 |
| Cd25 rs12722489 (G)             | (n genotype available) | 34                                      | 24 |
|                                 | G/G                    | 25                                      | 17 |
|                                 | A/G                    | 9                                       | 6  |
| Cd25 rs41295061 (C)             | (n genotype available) | 35                                      | 23 |
|                                 | C/C                    | 31                                      | 17 |
|                                 | A/C                    | 4                                       | 5  |
| Cd25 rs12722495 (A)             | (n genotype available) | 46                                      | 19 |
|                                 | A/A                    | 42                                      | 16 |
|                                 | G/A                    | 4                                       | 3  |

**Supplemental Table T3:** Subject characteristics for samples run on the nCounter SPRINT and reported in Figures 6-7

|                                                    | T2D, T1D, HC   |                   |              |
|----------------------------------------------------|----------------|-------------------|--------------|
|                                                    | T2D            | T1D               | HC           |
| number                                             | 25             | 8                 | 9            |
| Sex: % male (number males)                         | 36.0 (9)       | 37.5 (3)          | 22.2 (2)     |
| average age at sample collection [years] (min-max) | 39.4 (17-59)   | 44.4 (20-59)      | 44.2 (20-59) |
| average age at diagnosis [years] (min-max)         | n/a            | 25.9 (5-33)       | n/a          |
| average time since diagnosis [months] (min-max)    | 38.7 (1-154.8) | 222.5 (76-327)    | n/a          |
| average random c-peptide [ng/mL] (min-max)         | n/a            | 0.13 (<0.05-0.34) | n/a          |
| average HbA1c [%] (min-max)                        | 7.3* (5.5-9.9) | 7.6** (6.2-8.6)   | n/a          |
| average IFCC HbA1c [mmol/mol] (min-max)            | 56* (37-85)    | 60** (44-70)      | n/a          |

\* n=20 data points available; \*\* n=7 data points available

**Supplemental Table T4:** Subject characteristics for samples used in Figure 8

|                                                    | longitudinal placebo arm ITN trials |                  |                  |
|----------------------------------------------------|-------------------------------------|------------------|------------------|
|                                                    | slow                                | moderate         | rapid            |
| c-peptide decline                                  | slow                                | moderate         | rapid            |
| number                                             | 9                                   | 8                | 7                |
| Sex: % male (number males)                         | 44.4 (4)                            | 75.0 (6)         | 71.4 (5)         |
| average age at sample collection [years] (min-max) | 20.8 (12-33)                        | 22.6 (14-28)     | 20.0 (14-34)     |
| average age at diagnosis [years] (min-max)         | n/a                                 | n/a              | n/a              |
| average time since diagnosis [months] (min-max)    | <3.3                                | <3.3             | <3.3             |
| average HbA1c [%] (min-max)                        | 7.9 (5.6-15.2)                      | 7.5 (5.5-11.0)   | 7.1 (4.9-10.3)   |
| average IFCC HbA1c [mmol/mol] (min-max)            | 63 (38-143)                         | 58 (37-97)       | 54 (30-89)       |
| average MMTT 2h AUC at baseline (min-max)          | 1.03 (0.19-2.58)                    | 0.49 (0.01-0.78) | 0.83 (0.53-1.14) |
| average MMTT 2h AUC at M12/24 (min-max)            | 1.01 (0.24-2.78)                    | 0.27 (0.03-0.54) | 0.20 (0.09-0.32) |

**Supplemental Table T5:** Subject characteristics for samples used in Figure 9.

| c-peptide decline                                  | longitudinal ustekinumab trial |                   |                  |
|----------------------------------------------------|--------------------------------|-------------------|------------------|
|                                                    | slow                           | rapid             | uncertain        |
| number                                             | 11                             | 5                 | 4                |
| Sex: % male (number males)                         | 54.5 (6)                       | 40.0 (2)          | 22.2 (2)         |
| average age at sample collection [years] (min-max) | 25.4 (19-35)                   | 22.0 (18-27)      | 24.3 (18-31)     |
| average age at diagnosis [years] (min-max)         | 25.2 (18.8-34.9)               | 21.8 (17.9-26.8)  | 24.0 (17.7-30.8) |
| average time since diagnosis [months] (min-max)    | 2.0 (0.4-2.9)                  | 1.9 (1.3-2.3)     | 2.7 (1.7-3.3)    |
| average HbA1c [%] (min-max)                        | 8.6 (5.8-12.2)                 | 8.3 (6.8-9.1)     | 9.3 (7.1-11.0)   |
| average IFCC HbA1c [mmol/mol] (min-max)            | 70 (40-110)                    | 67 (51-76)        | 78 (54-97)       |
| average MMTT 2h AUC at baseline (min-max)          | 0.62 (0.25-1.40)               | 0.66 (0.39-0.83)  | 0.50 (0.29-0.80) |
| average MMTT 2h AUC at M12/24 (min-max)            | 0.56 (0.21-1.23)               | 0.17 (0.005-0.29) | n/a              |

**Supplemental Table T6:** antibody information for Treg sorting from PBMCs of cross-sectional T1D, matched controls and longitudinal samples from the placebo arms of the T1DAL and START trials

| target                | clone        | Fluorochrome/dye   | company                  |
|-----------------------|--------------|--------------------|--------------------------|
| CD3                   | UCHT1        | AlexaFluor700      | Thermo Fisher            |
| CD4                   | RPA-T4, OKT4 | PE                 | Biolegend, Thermo Fisher |
| CD14                  | 61D3         | APC                | Thermo Fisher            |
| CD19                  | HIB19        | PerCP Cy5.5, PerCP | Thermo Fisher            |
| CD20                  | 2H7          | FITC               | Thermo Fisher            |
| CD25                  | CD25-4E3     | Pe-eFluor610       | Thermo Fisher            |
| CD127                 | A019D5       | BV421              | Biolegend                |
| CD8*                  | RPA-T8       | BV650              | Biolegend                |
| Fixable viability dye | n/a          | eFluor506          | Thermo Fisher            |

\*used in a subset of sorts

**Supplemental Table T7:** antibody information for Treg sorting from CD4 T cell enriched cells of new onset adult T1D, matched controls, T2D and longitudinal samples from the Ustekinumab trial

| target                | clone    | Fluorochrome/dye | company        |
|-----------------------|----------|------------------|----------------|
| CD4                   | SK3      | BV510            | Biolegend      |
| CD25                  | 2A3      | BB515            | BD biosciences |
| CD127                 | eBioRDR5 | eFluor450        | Thermo Fisher  |
| Fixable viability dye | n/a      | eFluor780        | Thermo Fisher  |
